# Supplementary material for: Phytoplankton diversity and chemotaxonomy in contrasting North Pacific ecosystems
Source: PeerJ. 2023 Jan 3;11:e14501. doi: 10.7717/peerj.14501 (PMC9817951; doi:10.7717/peerj.14501)
Supplement: Supplemental Information 6 [file peerj-11-14501-s006.xlsx]

## Sheet: Cruise track and sampling info
		Time (UTC)	Lat	Lon	Station	CTD Cast #
cruise	date						depth	fito	SEM	NET	molecular
FK170124	20170127	22:45:00	20°48.9198	157°11.4809	0	1	0	+	+
FK170124	20170127				UW1		0	+	+
FK170124	20170128		22°14.6892	151°52.2906	1	4	0	+	+		+
FK170124	20170128		22°14.6892	151°52.2906	1	4	115	+	+		+
FK170124	20170128		22°14.6892	151°52.2906	1	4	130	+	+		+
FK170124	20170129		22°16.5251	151°44.8940	1	8	0	+	+		+
FK170124	20170129		22°16.5251	151°44.8940	1	8	115	+	+		+						32000	32
FK170124	20170129		22°16.5251	151°44.8940	1	8	125	+	+	+	+
FK170124	20170130	23:04:00	21°33.535	153°04.1357	UW2		0	+	+								48
		23:25:00	21°33.013	153°07.6645	UW2													80L
FK170124	20170131	23:58:00	21°21.5864	157°43,573	UW3		0	+	+			pocelo se uzimati i PIC i Hugov dusik						83
FK170124	20170201		21°45.8227	152°58.0105	UW4		0	+	+
			21°45.8174	152°51.4948
FK170124	20170202	23:22:00	23°04.3027	148°58.3216	UW5		0	+	+
FK170124	20170203		25°01.4528	145°01.6092	UW6		0	+	+
			25°03.8221	144° 56.7715
FK170124	20170203				sediment trap st 1				+
FK170124	20170204		27°6.927	140° 64.6991	UW7		0	+	+
FK170124	20170204				sediment trap kontrola st 1				+
FK170125	20170205				2	13		+	+			200mL volumen za SEM
FK170125	20170205
FK170125	20170205
FK170125	20170205		27°42.5971	139° 29.9381	2	14	0	+	+	+	+
FK170125	20170205		27°42.5971	139° 29.9381	2	14	88	+	+	+	+
FK170125	20170205		27°42.5971	139° 29.9381	2	14	128	+	+	+	+	7,600L
FK170125	20170205					15				+
FK170126	20170206		27°42.5971	139° 29.9381	2	18	0	+	+	+	+
FK170126	20170206		27°42.5971	139° 29.9381	2	18	98	+	+	+	+
FK170126	20170206		27°42.5971	139° 29.9381	2	18	127	+	+	+	+	7,900L
FK170126	20170206		27°39.6715	139° 33.0614	2	19	komb			+
FK170126	20170206		27°39.6715	139° 33.0614	2	19	130		+
FK170126	20170207		27°42.0327	139° 41.7295	2	21	0	+	+
FK170126	20170207		27°44.7694	139° 40.2311	2	22	0	+	+	+	+	molekularna integrirana sa svih dubina ukuno 8l filtrirano
FK170126	20170207		27°44.7694	139° 40.2311	2	22	95	+	+	+	+
FK170126	20170207		27°44.7694	139° 40.2311	2	22	120	+	+	+	+
FK170126	20170208	21:30:00	27°52.48	139° 21.07	UW8		0	+	+
FK170126		22:09:00	27°52.48	139° 21.07
FK170126	20170209				EXP1			+				kultura Dunaliela
FK170126	20170209				EXP2			+
FK170126	20170209				EXP3			+
FK170126	20170209	21:30:00	30°14.1787	134° 33.6715	UW9		0	+	+
FK170126			30°16.7323	134° 28.3016
FK170126	20170210	21:32:00	32°28.205	129° 24.515	UW10		0	+	+
FK170126			32°30.8827	129° 17.9670
FK170126	20170211	22:10:00	34°29.619	123° 58.992	UW11		0	+	+
FK170126	20170212	21:30:00	34°34.1060	123° 30.6151	3	29	0	+	+		+	molekularna integrirana sa svih dubina ukuno 8l filtrirano
FK170126	20170212		34°34.1060	123° 30.6151	3	29	31	+	+		+
FK170126	20170212		34°34.1060	123° 30.6151	3	29	42	+	+		+	SEM 200mL
FK170126	20170212		34°34.1060	123° 30.6151	3	29	komb			+
FK170126	20170213				3	33	0	+	+		+	3200mL
FK170126	20170213				3	33	24	+	+		+	4L
FK170126	20170213				3	33	30	+	+		+	4L
FK170126	20170213				3	33	komb			+
FK170126	20170214				TRANSECT TO W2	37	0	+	+				13:30:00
FK170126	20170214				TRANSECT TO W2	37	21	+	+				13:30:00
FK170126	20170214				TRANSECT TO W2	37	38	+	+				13:30:00
FK170126	20170214				TRANSECT TO W2	37	komb			+			13:30:00
FK170126	20170214				TRANSECT TO W2	38	0	+	+	+			18:30:00
FK170126	20170214				TRANSECT TO W2	39	0	+	+	+			23:00:00
FK170126	20170215				TRANSECT TO W2	40	0	+	+	+			06:30:00
FK170126	20170215				TRANSECT TO W2	41	0	+	+	+			11:30:00
FK170126	20170215				TRANSECT TO W2	41	14	+
FK170126	20170215				TRANSECT TO W2	41	27	+	+
FK170126	20170215				TRANSECT TO W2	41	900				+	3L
FK170126	20170215				TRANSECT TO W2	41	komb			+
FK170126	20170216				UW12		0	+	+
FK170126	20170217		41°28.4439	126° 18.8841	TRANSECT NORTH	42	0	+	+	+			06:00:00
FK170126	20170217		41°30.6406	125° 20.7072	TRANSECT NORTH	43	0	+	+	+	+	integ 4L	12:00:00
FK170126	20170217		41°30.6406	125° 20.7072	TRANSECT NORTH	43	80	+	+	+	+
FK170126	20170217		41°30.6406	125° 20.7072	TRANSECT NORTH	43	90	+	+	+	+	4L
FK170126	20170217		41°30.6406	125° 20.7072	TRANSECT NORTH	43	komb			+
FK170126	20170217		41°32.8395	124° 24.2721	TRANSECT NORTH	44	0	+	+	+			17:00:00
FK170126	20170217		41°32.8395	124° 24.2721	TRANSECT NORTH	46	0	+	+	+			21:00:00
