# Supplementary material for: Phytoplankton diversity and chemotaxonomy in contrasting North Pacific ecosystems
Source: PeerJ. 2023 Jan 3;11:e14501. doi: 10.7717/peerj.14501 (PMC9817951; doi:10.7717/peerj.14501)
Supplement: Supplemental Information 7 [file peerj-11-14501-s007.xlsx]

## Sheet: Species list
Taxon	Sediment trap
Diatoms
Alveus marinus (Grunow) Kaczmarska & Fryxell
Amphora sp.
Asterolampra marylandica Ehrenberg *
Asterolampra spp.	×
Asteromphalus heptactis (Brébisson) Ralfs*
Asteromphalus sarcophagus Wallich
Bacteriastrum comosum Pavillard
Bacteriastrum furcatum Shadbolt
Bacteriastrum minus G.Karsten*
Bacteriastrum biconicum Pavillard*
Bacteriastrum spp.*
Caloneis robusta Cleve
Chaetoceros aequatorialis Cleve*
Chaetoceros affinis Lauder
Chaetoceros atlanticus var. neapolitanus (Schroeder) Hustedt
Chaetoceros coarctatus Lauder*
Chaetoceros concavicornis L.A.Mangin*
Chaetoceros constrictus Gran
Chaetoceros contortus F.Schütt
Chaetoceros convolutus Castracane
Chaetoceros curvisetus Cleve*
Chaetoceros dadayi Pavillard*
Chaetoceros danicus Cleve
Chaetoceros debilis Cleve
Chaetoceros decipiens Cleve
Chaetoceros didymus Ehrenberg*
Chaetoceros densus (Cleve) Cleve
Chaetoceros diversus Cleve*
Chaetoceros indicus Karsten*
Chaetoceros laciniosus F.Schütt
Chaetoceros lauderi/teres Ralfs ex Lauder/Cleve
Chaetoceros messanensis Castracane
Chaetoceros perpusillus Cleve
Chaetoceros peruvianus Brightwell
Chaetoceros pseudoaurivillii J.Ikari*
Chaetoceros pseudobrevi Pavillard
Chaetoceros pseudodichaeta J.Ikari
Chaetoceros pseudosymmetricus E.Steemann Nielsen*
Chaetoceros radicans F.Schütt
Chaetoceros simplex Ostenfeld
Chaetoceros socialis H.S.Lauder
Chaetoceros spp.*	×
Chaetoceros tetrastichon Cleve
Climacodium biconcavum Cleve
Corethron hystrix Hensen
Coscinodiscus sp. 1*
Coscinodiscus sp. 2*
Cyclotella choctawhatcheeana Prasad
Cylindrotheca closterium (Ehrenberg) Reimann & J.C.Lewin *
Cylindrotheca spp.	×
Dactyliosolen fragilissimus (Bergon) Hasle
Dactyliosolen phuketensis (B.G.Sundström) G.R.Hasle
Detonula pumila (Castracane) Gran*
Ditylum brightwellii (T.West) Grunow*
Entomoneis sp.*
Eucampia cornuta (Cleve) Grunow*
Eucampia sp.
Fragilaria spp.	×
Fragilariopsis doliolus (Wallich) Medlin & P.A.Sims*	×
Gossliera tropica Schütt*
Guinardia delicatula (Cleve) Hasle
Guinardia flaccida (Castracane) H.Peragallo*
Gyrosigma sp.*
Haslea spp.*
Haslea wawrikae (Hustedt) R.Simonsen
Hemiaulus hauckii Grunow ex Van Heurck
	Hemidiscus spp.
Lennoxia faveolata H.A.Thomsen & K.R.Buck
Leptocylindrus danicus Cleve
Leptocylindrus mediterraneus (H.Peragallo) Hasle
Leptocylindrus spp.	×
Lioloma sp.*
	Lithodesmium spp.
Meuniera membranacea (Cleve) P.C.Silva
Navicula distans (W.Smith) Ralfs*
Navicula spp.
Neocalyptrella robusta (G.Norman ex Ralfs) Hernández-Becerril & Meave del Castillo
Neodelphineis indica (F.J.R.Taylor) Y.Tanimura
Nitzschia bicapitata Cleve
Nitzschia braarudii Hasle
Nitzschia longissima (Brébisson) Ralfs
Nitzschia sicula (Castracane) Hustedt
Nitzschia spp.	×
Odontella longicruris (Greville) M.A.Hoban*
Plagiotropis spp.
Planktoniella sol (G.C.Wallich) Schütt
Planktoniella spp.	×
Pleurosigma sp.
Podosira sp.*
Proboscia alata (Brightwell) Sundström
Pseudo-nitzschia delicatissima (Cleve) Heiden
Pseudo-nitzschia pseudodelicatissima (Hasle) Hasle
Pseudo-nitzschia seriata (Cleve) H.Peragallo*
Pseudo-nitzschia spp.	×
Pseudosolenia calcar-avis(Schultze) B.G.Sundström
Rhizosolenia castracanei H.Peragallo*
Rhizosolenia clevei Ostenfeld
Rhizosolenia clevei var. communis Sundström*
Rhizosolenia fallax B.G.Sundström*
Rhizosolenia formos H.Peragallo*
Rhizosolenia hebetata f. semispina (Hensen) Gran
Rhizosolenia imbricata Brightwell
Rhizosolenia setigera f. pungens (A.Cleve) Brunel*
Rhizosolenia spp.	×
Skeletonema sp.
Striatella sp.*
Thalassionema bacillare (Heiden) Kolbe
Thalassionema frauenfeldii (Grunow) Tempère & Peragallo*
Thalassionema nitzschioides (Grunow) Mereschkowsky
Thalassionema spp.	×
Thalassiosira rotula Meunier*
Thalassiosira spp.
Thalassiothrix spp.
Tropidoneis sp.*
Other unidentified diatoms (<20µm)
Dinoflagellata
Ceratocorys sp.*
Chrysocromulina sp.
Dinophysis acuminata Claparède & Lachmann*
Dinophysis sp.*
Diplopsalis sp.*
Gonyaulax spp.*
Gymnodinium spp.
Gyrodinium spp.	×
Karenia sp.
Oxytoxum spp.*
Oxytoxum variabile Schiller
Oxytoxum sphaeroideum Stein
Oxytoxum milneri Murray & Whitting
Phalacroma rotundatum (Claparéde & Lachmann) Kofoid & Michener*
Phalacroma sp.*
Phalacroma spp.	×
Podolampas elegans Schütt*
Podolampas palmipes Stein*
Podolampas sp.*
Podolampas spp.	×
Prorocentrum balticum (Lohmann) Loeblich*
Prorocentrum compressum (J.W.Bailey) Abé ex J.D.Dodge *
Prorocentrum micans Ehrenberg*
Prorocentrum rostratum Stein
Prorocentrum spp.	×
Protoperidinium bipes (Paulsen) Balech*
Protoperidinium spp.
Scrippsiella sp.
Scrippsiella spp.	×
Tripos arietinus (Cleve) F.Gómez*
Tripos azoricus (Cleve) F.Gómez*
Tripos carriensis (Gourret) F.Gómez*
Tripos concilians (Jørgenen) F.Gómez*
Tripos extensum (Gourret) F.Gómez*
Tripos furca (Ehrenberg) F.Gómez
Tripos fusus (Ehrenberg) F.Gómez
Tripos lineatum (Ehrenberg) F.Gómez*
Tripos macroceros (Ehrenberg) F.Gómez*
Tripos massiliensis (Gourret) F.Gómez
Tripos muelleri Bory*
Tripos pentagonum (Gourret) F.Gómez*
Tripos pulchellus (Schröder) F.Gómez*
Tripos spp.*	×
Tripos symmetricus (Pavillard) F.Gómez*
Tripos teres (Kofoid) F.Gómez
Other unidentified dinoflagellates (<20µm)
Coccolithophores
Acanthoica quattrospina Lohmann*
Calcidiscus leptoporus subsp. quadriperforatus (Kamptner) Geisen*
Calciosolenia brasiliensis (Lohmann) J.R.Young
Calciosolenia corsellii Malinverno*
Calciosolenia murrayi Gran
Calciosolenia spp.*
Calyptrosphaera galea Lecal-Schlauder*
Calyptrosphaera oblonga Lohmann
Calyptrosphaera sp.*
Coronosphaera mediterranea (Lohmann) Gaarder*
Discosphaera tubifera (Murray & Blackman) Ostenfeld
Discosphaera spp.	×
Emiliania huxleyi type A Young & Westbroek*
Emiliania huxleyi type B Young & Westbroek*
Florisphaera profunda Okada & Honjo*
Gephyrocapsa ericsonii McIntyre & Bé*
Gephyrocapsa ericsonii protohuxleyi type Cros & Fortuño*
Gephyrocapsa muellerae Bréhéret*
Helicosphaera carteri (Wallich) Kamptner*
Helicosphaera spp.*	×
Michaelsarsia adriatica (Schiller) Manton, Bremer & Oates
Michaelsarsia elegans Gran*
Ophiaster formosus Gran *
Ophiaster hydroideus (Lohmann) Lohmann*
Ophiaster sp.
Polycrater sp.*
Rhabdolithes claviger (G.Murray & Blackman) Voeltzkow*
Rhabdosphaera stylifera Lohmann
Rhabdosphaera xiphos (Deflandre & Fert) Norris*
Rhabdosphaera spp.	×
Scyphosphaera apsteinii Lohmann*
Scyphosphaera spp.	×
Syracosphaera anthos (Lohman) Janin*
Syracosphaera bannockii (Borsetti & Cati) Cros*
Syracosphaera corolla J.Lecal*
Syracosphaera dilatata Jordan*
Syracosphaera halldalii HOL Gaarder ex R.W.Jordan & J.C.Green*
Syracosphaera hirsuta Kleijne & Cros*
Syracosphaera marginaporata M.Knappertsbusch*
Syracosphaera molischii type 2 Young*
Syracosphaera molischii Schiller HOL*
Syracosphaera nana (Kamptner) Okada & McIntyre*
Syracosphaera nodosa Kamptner*
Syracosphaera ossa type 2 Young*
Syracosphaera pulchra Lohmann
Syracosphaera rotula Okada & McIntyre*
Syracosphaera sp.*
Syracosphaera spp.	×
Umbellosphaera irregularis Paasche*
Umbellosphaera tenuis (Kamptner) Paasche*
Umbilicosphaera foliosa (Kamptner ex Kleijne) Geisen*
Umbilicosphaera hulburtiana Gaardner*
Other unidentified Coccolithophores (<20µm)
Cryptophyceae
Cyanobacteria
Richelia intracelularis J.A.Schmidt
Other autotrophs
Chrysocromulina sp.
Dictyocha fibula Ehrenberg
Dictyocha spp.	×
Eutreptia sp.
Meringosphaera mediterranea Lohmann
Micromonas sp.
Octactis speculum (Ehrenberg) F.H.Chang, J.M.Grieve & J.E.Sutherland
Phaeocystis sp.
Other unidentified phytoflagellates (<20µm)
Other heterotrophs
Ebria tripartita (J.Schumann) Lemmermann*
Globigerina spp.*
Radiolaria sp.*
Rhabdonellopsis sp.*
Other unidentified heterotrophs (<20 µm)
List of taxons collected using CTD probes and by net with diameter of 20 µm.Taxons marked with an asterix are present only in net samples.
