# Supplementary material for: Phytoplankton diversity and chemotaxonomy in contrasting North Pacific ecosystems
Source: PeerJ journal article supplement (doi:10.7717/peerj.14501), 2023-01-03
Supplement: Supplemental_Figure_S1-edited.pdf [file Supplemental_Figure_S1-edited.pdf]

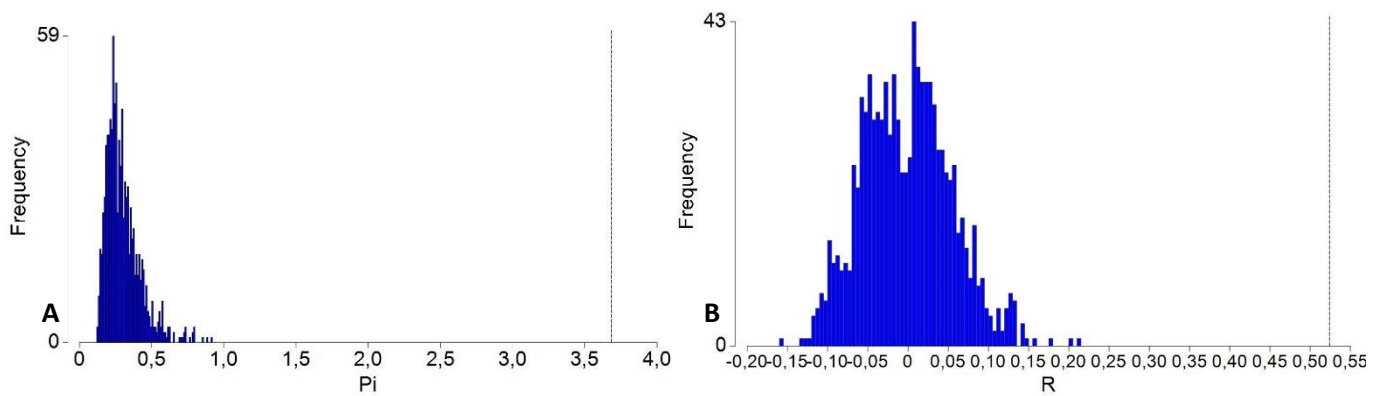

**Figure S1.** Statistical analysis of phytoplankton abundance data and pigment concentrations: **(a)** SIMPROF global test on Bray-Curtis similarity matrix of phytoplankton abundances. Pi value is 3.685 (vertical dotted line) with significance level of 0.1%. Number of permutations is 999. Line is out of the plotted area which means that the structure marked with full lines in the dendrogram (Fig 2.) is significant.; **(b)** RELATE analysis between phytoplankton abundances and pigment concentrations showing Spearman rank correlation (Rho) of 0.326 (vertical dotted line) with significance level of 0,1 % (number of permutations is 999).
